# Supplementary material for: Development and validation of a mouse model of contemporary cannabis smoke exposure
Source: PubMed Central journal article supplement — ERJ Open Res. 2021 Jul 19;7(3):00107-2021. doi: 10.1183/23120541.00107-2021 (PMC8287133; doi:10.1183/23120541.00107-2021), 2021-07-19
Supplement: 00107-2021.captions.pdf [file 00107-2021.captions.pdf]

**Figure S1. Lung tissue innate immune cell flow cytometry gating strategy.** Gating was determined based on population identification and fluorescence-minus-one controls. Gating strategy generated using lung tissue collected from a room air exposed female control mouse. Lineage gate contains B220+, CD3e+, and EpCAM+ cell populations.

**Figure S2. Acute cannabis smoke exposure increases plasma carboxyhemoglobin, THC, and carboxy-THC.** Male and female 6–8 week old BALB/c mice were exposed to room air (RA) or the smoke of 6 cannabis cigarettes (CS) twice in a day. Whole blood was collected via retro-orbital bleed 60 min following the second exposure session. (A) Carboxyhemoglobin (COHb) percentage was quantified via CO-oximetry. (B) Plasma tetrahydrocannabinol (THC), cannabidiol (CBD), and carboxy-tetrahydrocannabinol (COOH-THC) were quantified via mass spectroscopy. Dotted lines represent the limit of detection for specific cannabinoid. Data points at 0 ng/mL represent values below the limit of detection in cannabinoid analysis. Data represent mean  $\pm$  SEM; n = 3–5/group; \*P<0.05, unpaired t-test within each sex in COHb analysis.

**Table S1. Multiplex analysis of immune mediator expression in the lungs of male and female cannabis smoke exposed mice.** Experimental and lower limit of detection (LLD) values are represented in pg/mL. Bolded factors have quantities above the LLD and contain statistical significance in at least one sex. n = 5/group.
